# Supplementary material for: Strain-Specific Effects of Bifidobacterium longum on Hypercholesterolemic Rats and Potential Mechanisms
Source: PubMed Central journal article supplement (PMC7866116; doi:10.3390/ijms22031305), 2021-01-28

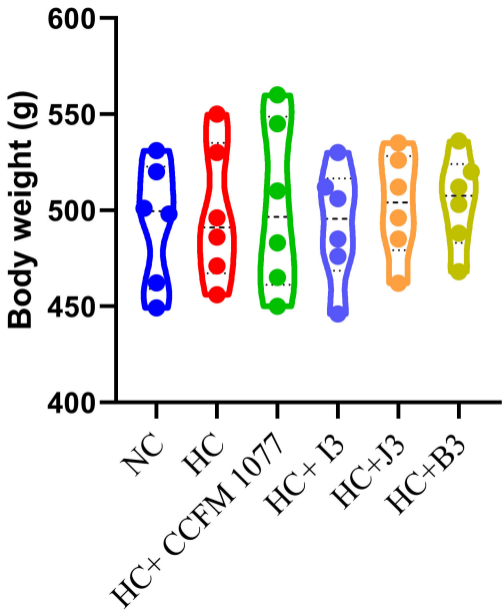

Supplement: ijms-22-01305-s001.pdf [file ijms-22-01305-s001.pdf]
